# Supplementary material for: Effects of La2O3 Nanoparticles and Bulk-La2O3 on the Development of Pfaffia Glomerata (Spreng.) Pedersen and Respective Nutrient Elements Concentration
Source: Research Square preprint supplement (doi:10.21203/rs.3.rs-947068/v1), 2021-11-09
Supplement: Supplementary file 1 [file a793f0844aa40bce4240f502.docx]

**Supplementary Information**

**Effects of La2O3 nanoparticles and bulk-La2O3 on the development of *Pfaffia glomerata* (Spreng.) Pedersen and respective nutrient elements concentration**

Vinicius Machado Nevesa, Graciela Marini Heidricha, Camila Cavalheiro da Costab, Julia Gomes Fariasc, Fernando Teixeira Nicolosob, Dirce Pozebond, and Valderi Luiz Dressler*a

*aFederal University of Santa Maria, Department of Chemistry, 97.105-900, Santa Maria, RS, Brazil.*

*bFederal University of Santa Maria, Department of Biology, 97.105-900, Santa Maria, RS, Brazil.*

*cArizona State University, 480-965-2100, Tempe, AZ, USA.*

*dFederal University of Rio Grande do Sul, Institute of Chemistry, 91.501-970, Porto Alegre, RS, Brazil.*

* To whom correspondence should be addressed: vdressler@gmail.com

Phone: +55 55 3220 9445

**1. Results of CRM analysis by ICP OES and ICP-MS**

The results of CRM (BCR 670 and NIST 1515) analysis by ICP OES and ICP-MS after acid digestion of samples are shown in Table S1. No significant difference between certified and obtained concentration values at a confidence level of 95% (*t*-Student, ρ < 0.05) was observed.

**Table S1.** Results of CRM analysis by ICP OES and ICP-MS after acid digestion. Concentrations are expressed as mean and standard deviation (1SD); n = 3.

| **Element** | **BCR 670 (µg g-1)** | | **NIST 1515 (µg g-1)** | |
| --- | --- | --- | --- | --- |
| **Certified** | **Determined** | **Certified** | **Determined** |
| La | 0.487 ± 0.02 | 0.523 ± 0.03 | n.i. | n.d. |
| Ca* | n.i. | n.d. | 1.526 ± 0.015 | 1.588 ± 0.144 |
| Cu | n.i. | n.d. | 5.64 ± 0.24 | 5.49 ± 0.31 |
| Fe | n.i. | n.d. | 83 ± 5 | 74 ± 5 |
| K* | n.i. | n.d. | 1.61 ± 0,02 | 1.69 ± 0.14 |
| Mg* | n.i. | n.d. | 0.271 ± 0.008 | 0.277 ± 0.012 |
| Mn | n.i. | n.d. | 54 ± 3 | 49 ± 2 |
| Mo | n.i. | n.d. | 0.094 ± 0.013 | 0.074 ± 0.011 |
| P* | n.i. | n.d. | 0.159 ± 0.011 | 0.156 ± 0.015 |
| S* | n.i. | n.d. | n.i. | 0.197 ± 0.056 |
| Zn | n.i. | n.d. | 12.5 ± 0.3 | 12.9 ± 0.9 |

*: Concentration in %.

n.d.: not determined.

n.i.: not informed.

**2. Analytical characteristics of the LA-ICP-MS method and results of CRM analysis**

The methodology developed by Nunes *et al.*25was applied to obtain quantitative mapping of Cu, Mn, Mo and Zn in plants leaves. However, it was not possible to obtain calibration curves for Ca, Fe, Mg, P and S, probably due to isobaric or polyatomic ions interferences in LA-ICP-MS technique.22 The calibration curves equations, linear correlation coefficient, LOD and the LOQ for Cu, Mn, Mo and Zn are informed in Table S2.

**Table S2.** Parameters of calibration curve for LA-ICP-MS analysis. 13C was used as internal standard.

| **Element** | **Equation** | **R2** | **LOD (µg g-1)** | **LOQ (µg g-1)** |
| --- | --- | --- | --- | --- |
| Cu | y = 0.0132x – 0.0064 | 0.9998 | 0.38 | 1.26 |
| Mn | y = 0.0376x – 0.4157 | 0.9990 | 0.92 | 2.74 |
| Mo | y = 0.0283x – 0.006 | 0.9972 | 0.14 | 0.22 |
| Zn | y = 0.0029x + 0.0028 | 0.9982 | 1.34 | 3.13 |

No significant difference between the certified concentration values for the CRM (NIST 1515) and Cu, Mn and Zn concentrations found were observed at a confidence level of 95% (*t*-Student, ρ <0.05). However, it was not possible to check the accuracy for Mo, because its concentration in the CRM was below the method LOQ. The results of the CRM analysis are given in Table S3.

**Table S3.** Results of the CRM (NIST 1515) analysis by LA-ICP-MS. Concentrations are expressed as mean and standard deviation (1SD); n = 3.

| **Element** | **Concentration (µg g-1)** | |
| --- | --- | --- |
| **Certificated** | **Determined** |
| Cu | 5.64 ± 0.24 | 5.76 ± 0.15 |
| Mn | 54 ± 3 | 56 ± 1 |
| Mo | 0.094 ± 0.013 | < 0.22* |
| Zn | 12.5 ± 0.3 | 10.8 ± 0.9 |

*LOQ: limit of quantification.
